# Supplementary material
Source: Springer Nature journal article supplement (https://www.springermedizin.de/resource/supplementary/12967_2011_733_MOESM7_ESM.pdf/9577390)

**Active Force (fraction of DKO)**

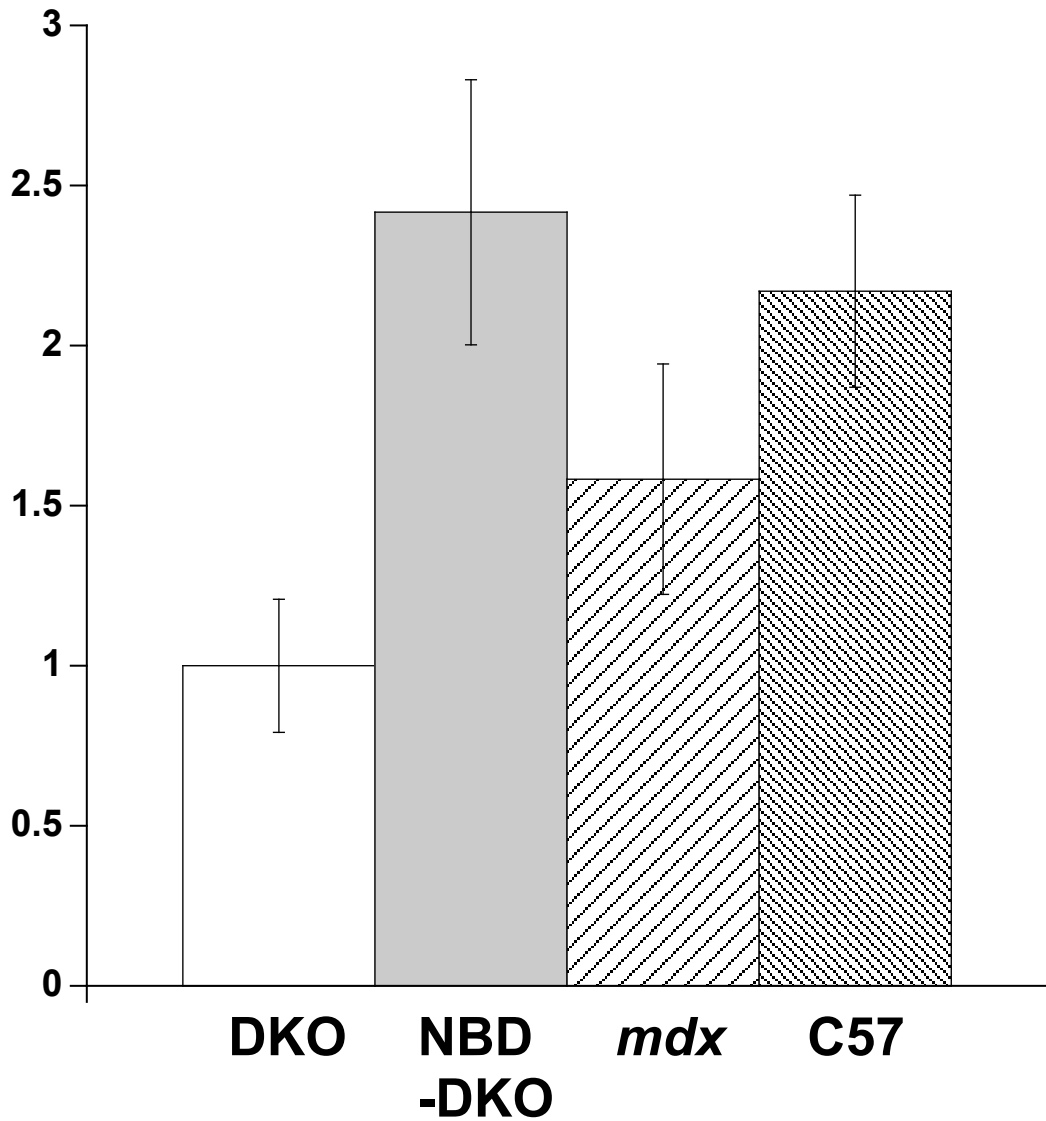

Supplement: MOESM7 [file 9577390]
